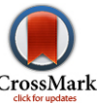

# Influence of Electrical Resistivity and Machining Parameters on Electrical Discharge Machining Performance of Engineering Ceramics

Renjie Ji\*, Yonghong Liu, Ruiqiang Diao, Chenchen Xu, Xiaopeng Li, Baoping Cai, Yanzhen Zhang

College of Electromechanical Engineering, China University of Petroleum, Qingdao, Shandong, China

## Abstract

Engineering ceramics have been widely used in modern industry for their excellent physical and mechanical properties, and they are difficult to machine owing to their high hardness and brittleness. Electrical discharge machining (EDM) is the appropriate process for machining engineering ceramics provided they are electrically conducting. However, the electrical resistivity of the popular engineering ceramics is higher, and there has been no research on the relationship between the EDM parameters and the electrical resistivity of the engineering ceramics. This paper investigates the effects of the electrical resistivity and EDM parameters such as tool polarity, pulse interval, and electrode material, on the ZnO/Al<sub>2</sub>O<sub>3</sub> ceramic's EDM performance, in terms of the material removal rate (MRR), electrode wear ratio (EWR), and surface roughness (SR). The results show that the electrical resistivity and the EDM parameters have the great influence on the EDM performance. The ZnO/Al<sub>2</sub>O<sub>3</sub> ceramic with the electrical resistivity up to 3410 Ω·cm can be effectively machined by EDM with the copper electrode, the negative tool polarity, and the shorter pulse interval. Under most machining conditions, the MRR increases, and the SR decreases with the decrease of electrical resistivity. Moreover, the tool polarity, and pulse interval affect the EWR, respectively, and the electrical resistivity and electrode material have a combined effect on the EWR. Furthermore, the EDM performance of ZnO/Al<sub>2</sub>O<sub>3</sub> ceramic with the electrical resistivity higher than 687 Ω·cm is obviously different from that with the electrical resistivity lower than 687 Ω·cm, when the electrode material changes. The microstructure character analysis of the machined ZnO/Al<sub>2</sub>O<sub>3</sub> ceramic surface shows that the ZnO/Al<sub>2</sub>O<sub>3</sub> ceramic is removed by melting, evaporation and thermal spalling, and the material from the working fluid and the graphite electrode can transfer to the workpiece surface during electrical discharge machining ZnO/Al<sub>2</sub>O<sub>3</sub> ceramic.

**Citation:** Ji R, Liu Y, Diao R, Xu C, Li X, et al. (2014) Influence of Electrical Resistivity and Machining Parameters on Electrical Discharge Machining Performance of Engineering Ceramics. PLoS ONE 9(11): e110775. doi:10.1371/journal.pone.0110775

**Editor:** Ming Dao, Massachusetts Institute Of Technology, United States of America

**Received:** May 6, 2014; **Accepted:** September 24, 2014; **Published:** November 3, 2014

**Copyright:** © 2014 Ji et al. This is an open-access article distributed under the terms of the Creative Commons Attribution License, which permits unrestricted use, distribution, and reproduction in any medium, provided the original author and source are credited.

**Data Availability:** The authors confirm that all data underlying the findings are fully available without restriction. All relevant data are within the paper.

**Funding:** The study was financially supported by the National Natural Science Foundation of China under grant number 51205411, and Shandong Provincial Natural Science Foundation of China under grant number ZR2012EEL15. The funders had no role in study design, data collection and analysis, decision to publish, or preparation of the manuscript.

**Competing Interests:** The authors have declared that no competing interests exist.

\* Email: jirenjie@upc.edu.cn

## Introduction

Advances in materials engineering have led to the development of a generation of materials which present better properties for their use in different industrial sectors. Between them, engineering ceramics are widely employed in the manufacturing industry, defense industry, aerospace, and other fields due to their high hardness, high temperature strength and high corrosion resistance [1]. However, their machinability when conventional machining methods are used is not good due to their poor thermal properties, high wear and corrosion resistance, brittleness and hardness properties [2–5].

Electrical discharge machining (EDM) is a most popular material removal process based on the concept of material removal by electric discharges. Each of those discharges removes a small amount of material from the workpiece due to the high temperature during the discharge process. The process can machine any material provided that it can conduct electricity, so the process is used to machine very hard conductive materials. Brittle materials such as engineering ceramics can also be

machined by this process because that there is no contact between electrode and workpiece leads to the absence of forces during the erosion [6–8].

However, the electrical resistivity of the popular engineering ceramics is higher than that of metal, which makes machining engineering ceramics more difficult than machining metal using EDM. Recently, some researches about EDM performance of engineering ceramics with different electrical resistivities have been made.

The unidirectional conductivity of semiconductor crystals with the electrical resistivity of 2.1 Ω·cm during EDM has been investigated by Qiu et al. [9]. The results show that the semiconductor crystals with the electrical resistivity of 2.1 Ω·cm can be directly machined by EDM. W. König et al. [10] have found that the high removal rate as compared with traditional techniques for machining ceramic materials can be obtained provided that their electrical resistivity is below of 100 Ω·cm. Liu and co-workers [11–12] have investigated electrical discharge milling SiC ceramics with the electrical resistivity of 500 Ω·cm, and found that the process is able to effectively machine SiC

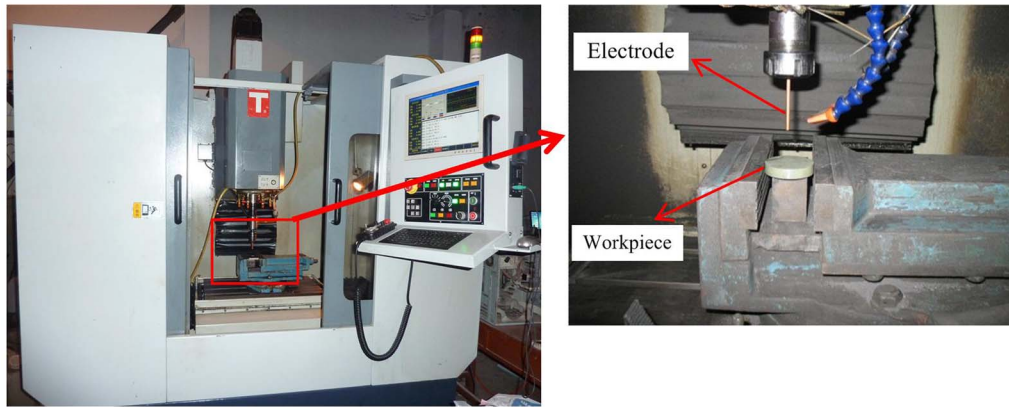

**Figure 1.** EDM milling machine for machining ZnO/Al<sub>2</sub>O<sub>3</sub> ceramic. doi:10.1371/journal.pone.0110775.g001

ceramics with the electrical resistivity of 500  $\Omega\cdot\text{cm}$  due to the good flushing and quickly cooling in the discharge gap. The electrical resistivity versus TiN content in TiN/Si<sub>3</sub>N<sub>4</sub> composites has been studied by Liu et al. [13]. The results show that the electrical resistivity of the composites is approximately 0.01  $\Omega\cdot\text{cm}$  when TiN content is higher than 30 vol.%, so that EDM can be used to machine this material. Tak et al. [14] have investigated the characteristic evaluation of aluminum oxide (Al<sub>2</sub>O<sub>3</sub>)/carbon nanotubes (CNTs) hybrid composites with different CNTs contents for micro-electrical discharge machining, and they found that the electrical resistivity has a decreasing tendency as the CNTs content is increased, the electrical resistivity has a critical point at Al<sub>2</sub>O<sub>3</sub>/5% CNTs, and the dimensional accuracy and circularity of Al<sub>2</sub>O<sub>3</sub>/5% CNTs composites are superior to other ones due to homogeneous distribution of CNTs in matrix. Hanaoka and co-workers [15] have fabricated Si<sub>3</sub>N<sub>4</sub> composites containing carbon nanotube and graphene Nano platelet with different contents. The results show that the lower material removal rate, better electrode wear ratio, and better surface roughness could be obtained on the conductive materials than insulating materials. Moreover, the Si<sub>3</sub>N<sub>4</sub> composite containing 0.9 vol.% for carbon nanotube with the electrical conductivity of 0.04 S·m<sup>-1</sup>, can be machined by the normal EDM method, but the rougher hole edge shape is obtained when the Si<sub>3</sub>N<sub>4</sub> composite is machined by the normal EDM method, compared with the assisting electrode EDM method.

It is also known that when the electrical resistivity of the engineering ceramics is low, the electrical discharge of the engineering ceramics is stable, and the machining performance is fine. As the electrical resistivity of the engineering ceramics increases, the discharge instability occurs, which will deteriorate the machining performance. But so far there have been no research papers about the effect of the electrical resistivity on EDM performance by the authors. Moreover, there is yet no studying about the relationship between the EDM parameters and

the electrical resistivity of the engineering ceramics when applying the EDM technology. Therefore, the authors have decided to investigate the effects of the electrical resistivity and machining parameters, such as tool polarity, pulse interval, and electrode material, on the process performance in terms of the material removal rate (MRR), electrode wear ratio (EWR), and surface roughness (SR Ra).

## Experimental Procedures

The experiment was performed in a self-developed EDM milling machine, as illustrated in Figure 1. The workpiece was ZnO/Al<sub>2</sub>O<sub>3</sub> ceramic with different Al<sub>2</sub>O<sub>3</sub> contents. The electrical resistivity of the ZnO/Al<sub>2</sub>O<sub>3</sub> ceramic was measured with a pointer insulation resistance tester (PC40B, Shanghai Anbiao Electronics Corporation, China) and a digital ohmmeter (SD2002, Shanghai Qianfeng Electronic Instrument Corporation, China). The electrical resistivity of the ZnO/Al<sub>2</sub>O<sub>3</sub> ceramics with different Al<sub>2</sub>O<sub>3</sub> contents was listed in Table 1.

The weighings of the workpiece and the electrode before and after machining were measured by an electron balance (Sartorius BS224S, Germany). The material removal rate (MRR) and electrode wear ratio (EWR) were calculated according to Equations (1) and (2), respectively. The surface roughness (SR) was measured by a surface roughness tester (TR300, Qingdao Times Instrument Corporation, China). The microstructure of the workpiece surface was examined with an electron probe micro-analyzer (EPMA JEOL JXA-8230, Japan), equipped with an energy dispersive spectrometer (EDS Oxford Inca X-Act). All the observed specimens had been cleaned ultrasonically and dried with a hot-air blower before the examination.

$$MRR = \frac{(m_1 - m_3)}{\rho_1 \times t} \quad (1)$$

**Table 1.** The electrical resistivity of ZnO/Al<sub>2</sub>O<sub>3</sub> ceramic with different Al<sub>2</sub>O<sub>3</sub> content.

| Al <sub>2</sub> O <sub>3</sub> content (Wt%)      | 0      | 0.01 | 0.05 | 0.1 | 0.5 | 1     | 1.5 | 2   |
|---------------------------------------------------|--------|------|------|-----|-----|-------|-----|-----|
| Electrical resistivity ( $\Omega\cdot\text{cm}$ ) | 324000 | 3410 | 2470 | 687 | 15  | 11.64 | 9   | 6.3 |

doi:10.1371/journal.pone.0110775.t001

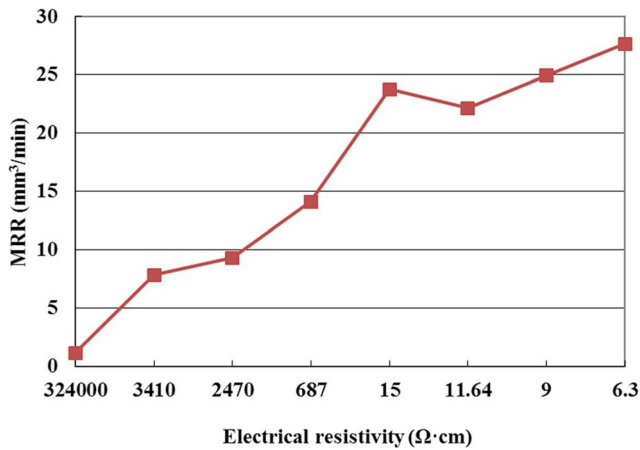

**Figure 2. Effect of the electrical resistivity on MRR.**  
doi:10.1371/journal.pone.0110775.g002

$$EWR = \frac{\rho_1(m_2 - m_4)}{\rho_2(m_1 - m_3)} \times 100\% \quad (2)$$

where  $m_1$ ,  $m_2$  were the weighings of workpiece and electrode before machining, respectively,  $m_3$ ,  $m_4$  were the weighings of workpiece and electrode after machining, respectively,  $\rho_1$ ,  $\rho_2$  were the densities of workpiece and electrode, respectively,  $t$  was the machining time.

Unless otherwise specified, the following experimental parameters were used: The electrode was copper rod 4 mm in diameter and a length of 10 mm, the tool polarity was negative, the pulse duration was 200 $\mu$ s, the pulse interval was 50 $\mu$ s, the open-circuit voltage was 150V, the discharge current was 50A, and the working fluid was composed of 10 mass% emulsified oil and 90 mass% distilled water, which were mixed with a constant speed power-driver mixer.

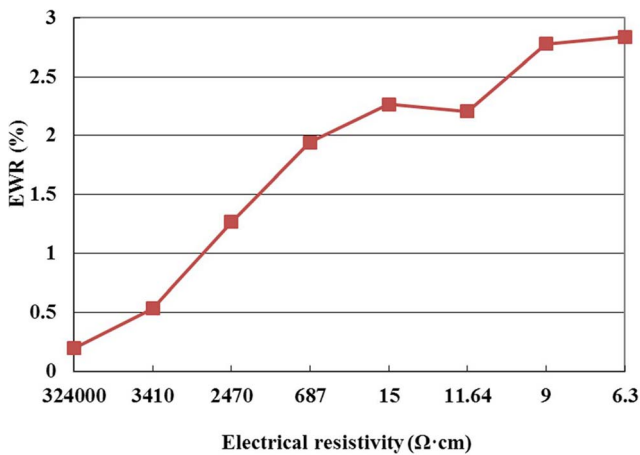

**Figure 3. Effect of the electrical resistivity on EWR.**  
doi:10.1371/journal.pone.0110775.g003

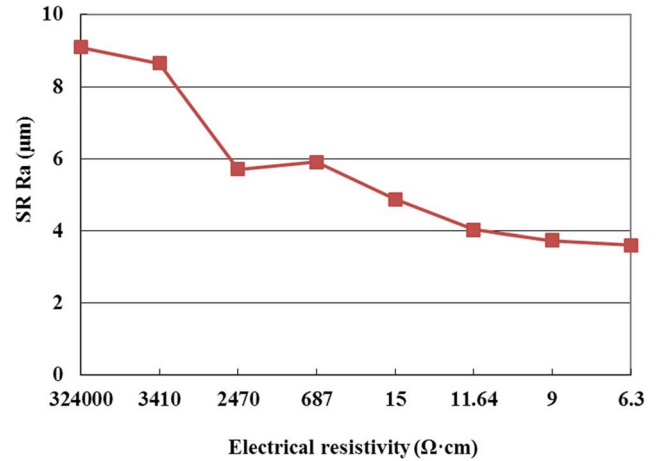

**Figure 4. Effect of the electrical resistivity on SR.**  
doi:10.1371/journal.pone.0110775.g004

## Results and Discussion

### Effect of the electrical resistivity on the process performance

The effect of the electrical resistivity on MRR is illustrated in Figure 2, for the positive tool polarity and pulse interval of 20 $\mu$ s. As shown in this figure, the MRR increases with the decrease of electrical resistivity. This phenomenon can be explained as follows. As the electrical resistivity decreases, the discharge channel is formed easily, the discharge delay time decreases, the discharge becomes violent, and the discharge energy released to the workpiece at the same time increases, so the MRR increases.

Figure 3 shows the effect of the electrical resistivity on EWR, for the positive tool polarity and pulse interval of 20 $\mu$ s. It can be seen from this figure that the EWR increases with the decrease of electrical resistivity. The reason for this is that when the electrical resistivity decreases, the discharge channel is formed easily, and the electrode material removal increases; therefore the EWR increases.

SR with positive tool polarity and pulse interval of 20 $\mu$ s is given in Figure 4. The figure indicates that the SR decreases with the decrease of electrical resistivity. Many things can cause this phenomenon. When the electrical resistivity decreases, the

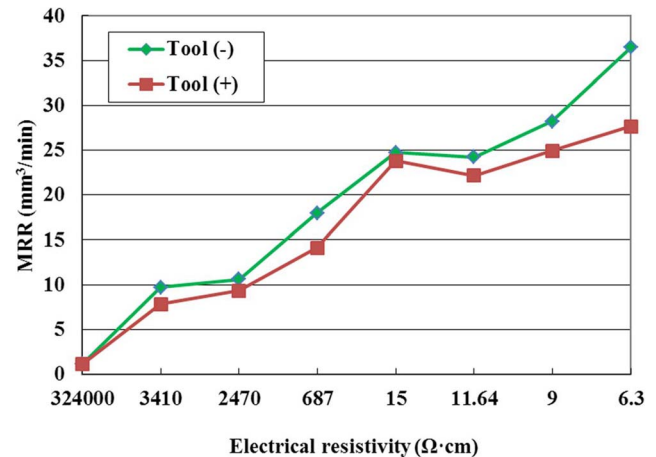

**Figure 5. Effect of the tool polarity on MRR.**  
doi:10.1371/journal.pone.0110775.g005

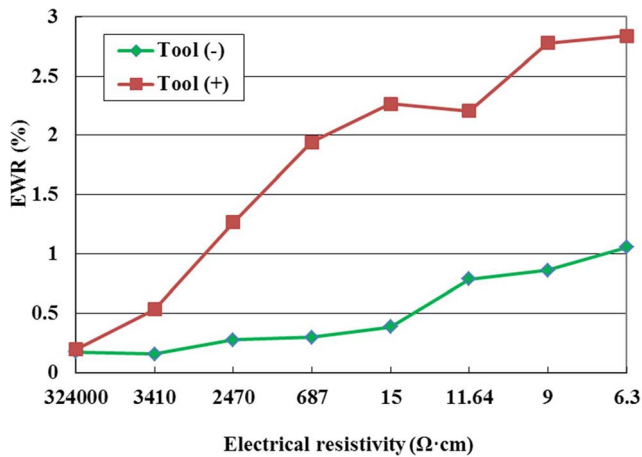

**Figure 6. Effect of the tool polarity on EWR.**  
doi:10.1371/journal.pone.0110775.g006

discharge occurs easily, and the workpiece is removed by vaporization and melting, which makes the workpiece surface smooth, so the SR decreases with the decrease of electrical resistivity.

#### Effect of the tool polarity on the process performance

The effect of the tool polarity on MRR is illustrated in Figure 5 for the pulse interval of 20 $\mu$ s. As shown in this figure, the MRR with positive tool polarity is lower than that with negative tool polarity at the same electrical resistivity. There are many reasons causing this phenomenon. Compared with metal, the electrical resistivity of ZnO/Al<sub>2</sub>O<sub>3</sub> ceramic is higher, the discharge delay time is longer, and the effective discharge time during a pulse is shorter. Because the mass of the electrons is much smaller than that of positive ions, they can be accelerated quickly during a short time, the bombardment effect by electrons is stronger than that by positive ions; therefore the MRR is high in negative tool polarity.

Figure 6 shows the effect of the tool polarity on EWR for the pulse interval of 20 $\mu$ s. It can be seen from this figure that the EWR with the positive polarity is higher than that with the negative polarity at the same electrical resistivity. As mentioned above, the bombardment effect by the electrons is stronger than that by

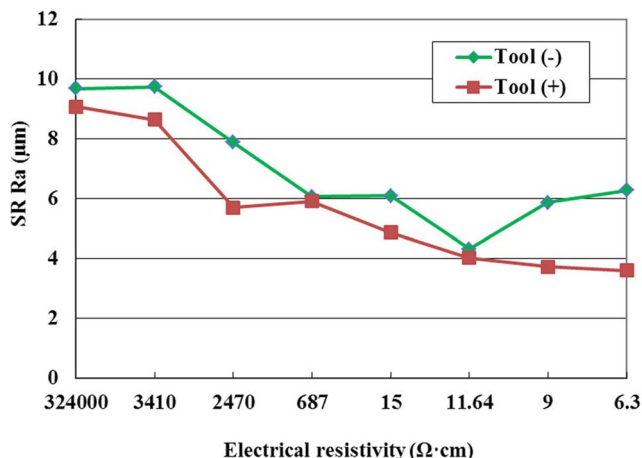

**Figure 7. Effect of the tool polarity on SR.**  
doi:10.1371/journal.pone.0110775.g007

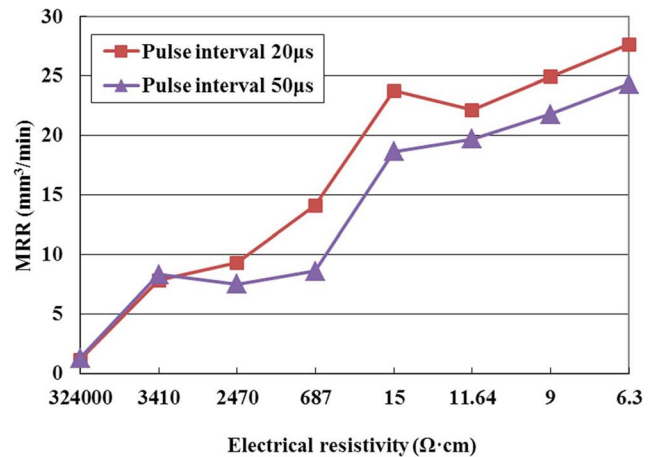

**Figure 8. Effect of the pulse interval on MRR.**  
doi:10.1371/journal.pone.0110775.g008

positive ions during electrical discharge machining ZnO/Al<sub>2</sub>O<sub>3</sub> ceramic, so the electrode wear ratio is high in positive tool polarity.

The effect of the tool polarity on SR is shown in Figure 7 for the pulse interval of 20 $\mu$ s. The figure indicates that under the same conditions the SR in negative tool polarity is higher than that in positive tool polarity. This phenomenon can be explained as follows. The bombardment effect by electrons is stronger than that by positive ions, the craters on the workpiece surface produced by electrons are deep; therefore, the SR is high in negative tool polarity. It can also be seen from Figure 7 that the SR increases with the decrease of electrical resistivity with the negative tool polarity when the electrical resistivity is low. The reason for this is that when the electrical resistivity is lower than 11.64  $\Omega\cdot$ cm, the discharge channel is easily formed, the bombardment effect by electrons is strong, the discharge crater is large with the negative tool polarity, so the SR increases with the decrease of electrical resistivity.

#### Effect of the pulse interval on the process performance

The effect of the pulse interval on MRR is illustrated in Figure 8 for the positive tool polarity. As shown in this figure, the MRR decreases with the increase of pulse interval at the same electrical resistivity. This phenomenon can be explained as follows. The

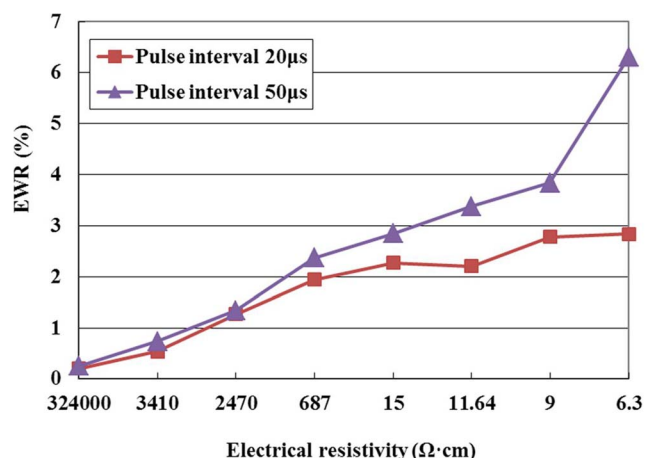

**Figure 9. Effect of the pulse interval on EWR.**  
doi:10.1371/journal.pone.0110775.g009

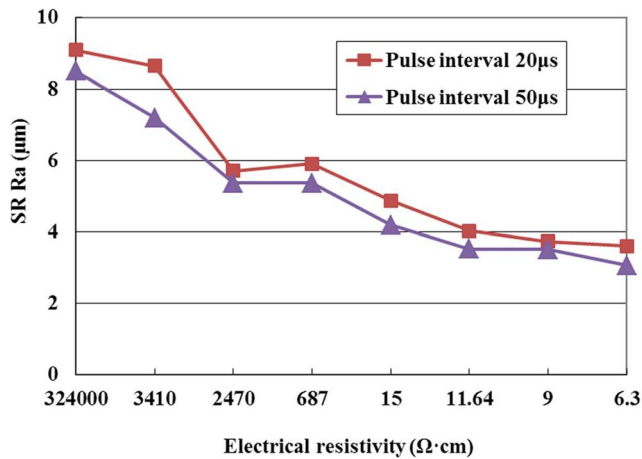

**Figure 10. Effect of the pulse interval on SR.**  
doi:10.1371/journal.pone.0110775.g010

discharge frequency and the material removal in a unit time decrease with an increase in pulse interval, so the MRR with the pulse interval of 50 $\mu\text{s}$  is lower than that with the pulse interval of 20 $\mu\text{s}$  at the same electrical resistivity.

Figure 9 shows the effect of the pulse interval on EWR for the positive tool polarity. It can be seen from this figure that the EWR increases with the increase of pulse interval at the same electrical resistivity. Many things can cause this phenomenon. As the pulse interval increases, the time for deionization of the dielectric increases, the discharge energy delivered to the machining gap decreases in a unit time, the released carbon decomposed from the dielectric decreases, the deposition effect weakens, and the electrode wear compensation decreases [16]; therefore, the EWR increases.

SR with different pulse interval settings is given in Figure 10 for the positive tool polarity. It can be seen from this figure that under the same conditions the SR decreases with the increase of pulse interval. This phenomenon can be explained as follows. A longer pulse interval means more time for deionization of the dielectric, the discharge is stable, and the amount of craters generated by EDM is less; therefore, the SR with the pulse interval of 50 $\mu\text{s}$  is lower than that with the pulse interval of 20 $\mu\text{s}$  at the same electrical resistivity.

### Effect of the electrode material on the process performance

The effect of the electrode material on MRR is illustrated in Figure 11. As shown in this figure, the MRR with copper electrode is higher than that with graphite electrode at the same electrical resistivity, especially when the electrical resistivity is low. There are many reasons causing this phenomenon. Compared with graphite electrode, the electrical conductivity of copper electrode is better, the discharge channel is formed relatively easily, the discharge delay time is shorter, as illustrated in Figure 12, and the discharge energy is higher, which enhances the workpiece material removal. Furthermore, when the copper electrode is used and the electrical resistivity is lower than 687  $\Omega \cdot \text{cm}$ , the discharge channel is formed easily, the pulse utilization ratio is high, the discharge is violent, so the MRR is high.

Figure 13 shows the effect of the electrode material on EWR. It can be seen from this figure that the EWR with copper electrode initially increases with the decrease of electrical resistivity, and then decreases with the decrease of electrical resistivity, however,

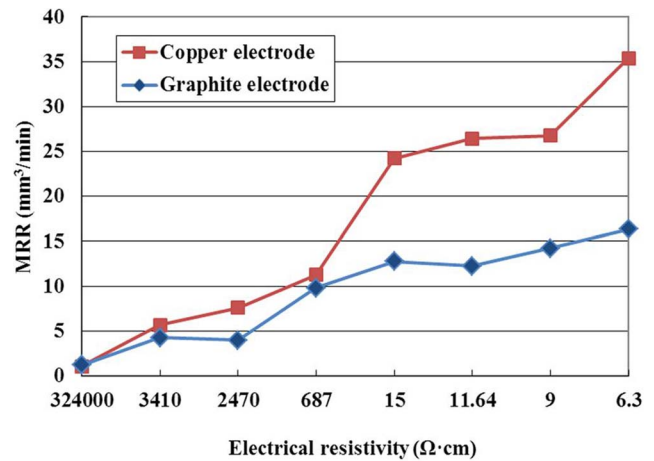

**Figure 11. Effect of the electrode material on MRR.**  
doi:10.1371/journal.pone.0110775.g011

the EWR with graphite electrode initially increases slowly with the decrease of electrical resistivity, and then increases rapidly with the decrease of electrical resistivity. This is a complex phenomenon. When the electrical resistivity is high, the discharge channel occurs difficultly, and there are few discharges with any electrode material, so the electrode removal is low. When the copper electrode is used and the electrical resistivity is lower than 687  $\Omega \cdot \text{cm}$ , the discharge is stable, a deposition layer can form on the electrode surface due to the decomposition of the dielectric and workpiece material attached to the tool electrode surface, and the electrode wear can be prevented by the protective effects of the deposition layer, so the EWR is low. However, when the graphite electrode is used and the electrical resistivity is lower than 687  $\Omega \cdot \text{cm}$ , the discharge channel is formed easily, the discharge force is high, which can remove the graphite electrode easily due to its low hardness and soft texture; therefore, the EWR increases rapidly with the decrease of electrical resistivity.

It can also be seen from Figure 13 that the EWR with copper electrode is higher than that with graphite electrode when the electrical resistivity is high, and the opposite case happens when the electrical resistivity is low. This phenomenon can be explained as follows. When the electrical resistivity is high, the discharge channel occurs difficultly, compared with graphite electrode, the discharge with copper electrode occurs relatively easily, which enhances the electrode material removal, so the EWR with copper electrode is higher than that with graphite electrode. However, when the electrical resistivity is lower than 687  $\Omega \cdot \text{cm}$ , the discharge channel is formed easily, the copper electrode wear can be prevented by the protective effects of the deposition layer, and the graphite electrode removal is enhanced due to its low hardness and soft texture, so the EWR with graphite electrode is higher than that with copper electrode.

SR with different machining conditions is given in Figure 14. The figure indicates that the SR with copper electrode is lower than that with graphite electrode at the same electrical resistivity. Many things can cause this phenomenon. Compared with graphite electrode, the electrical conductivity of copper electrode is better, the discharge channel is formed relatively easily, and the workpiece is removed by vaporization and melting, which makes the workpiece surface smooth, so the SR with copper electrode is lower.

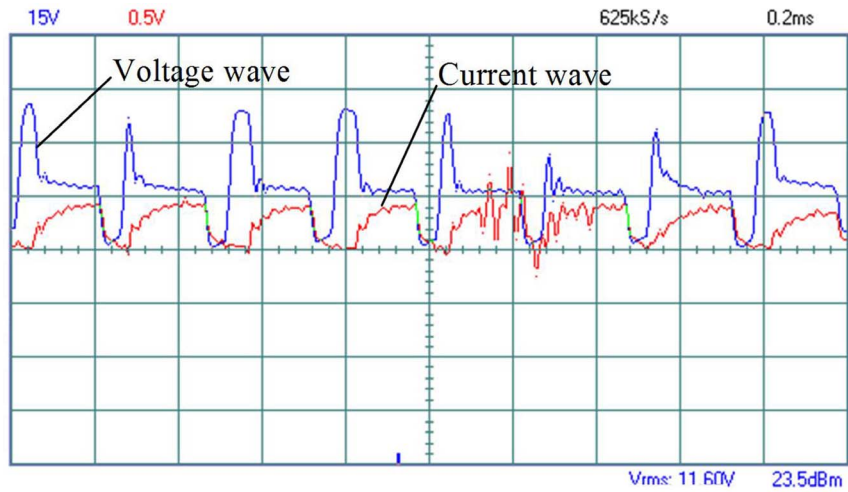

(a) Discharge waves with copper electrode

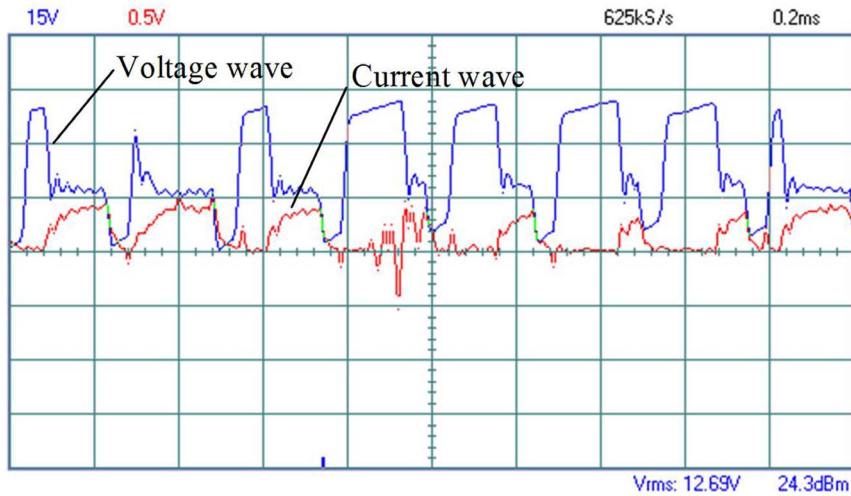

(b) Discharge waves with graphite electrode

**Figure 12. Discharge waves of the ZnO/Al<sub>2</sub>O<sub>3</sub> ceramics with electrical resistivity of 11.64 Ω·cm and different electrodes.**  
doi:10.1371/journal.pone.0110775.g012

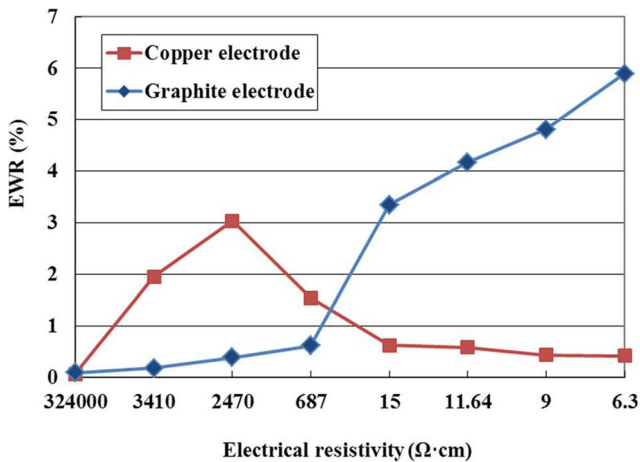

**Figure 13. Effect of the electrode material on EWR.**  
doi:10.1371/journal.pone.0110775.g013

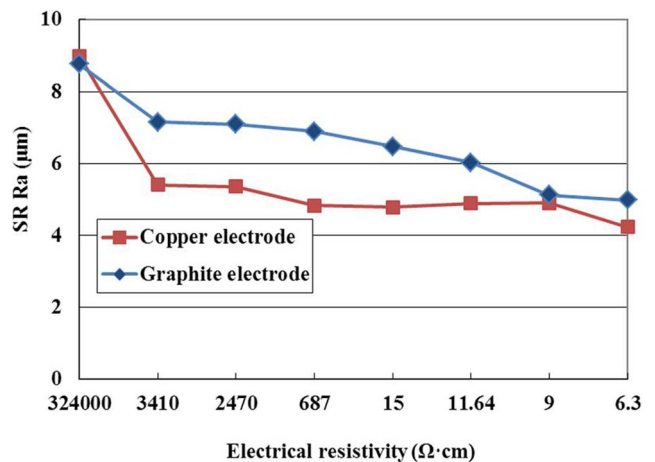

**Figure 14. Effect of the electrode material on SR.**  
doi:10.1371/journal.pone.0110775.g014

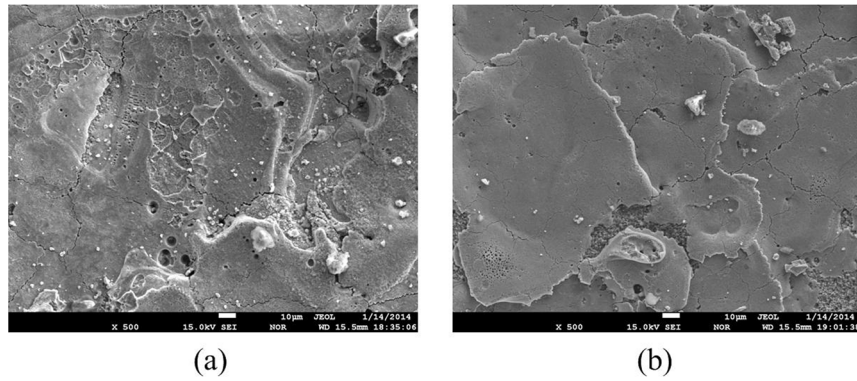

(a)

(b)

**Figure 15. Micrographs of machined ZnO/Al<sub>2</sub>O<sub>3</sub> ceramic surfaces with different tool polarities: (a) tool(-); (b) tool(+).**  
doi:10.1371/journal.pone.0110775.g015

### Microstructure character analysis of ZnO/Al<sub>2</sub>O<sub>3</sub> ceramic surface machined by EDM

**Micro-topography of the machined surface.** The micrographs of the machined ZnO/Al<sub>2</sub>O<sub>3</sub> ceramic surface for pulse interval of 20µs and the electrical resistivity of 2470 Ω·cm with different tool polarities are illustrated in Figure 15. Many craters, droplets and micropores exist in the micrographs. The phenomenon indicates that the ZnO/Al<sub>2</sub>O<sub>3</sub> ceramic is molten or evaporated by the sparking thermal energy. The formation of the craters on these surfaces is due to sparks that form on the surface generating melting or possible evaporation. As the spark ceases, most molten material is flushed away, but not all of the molten material can be removed because of the surface tension, and bonding forces between liquid and solid. The molten material remained on the workpiece surface is cooled by the working fluid, and some droplets are formed. The formation of micropores is ascribed to the ejection of gases that escape from the solidified material.

It is obvious that the surface is rougher, and the craters are bigger and deeper in case of negative tool polarity, when compared to positive tool polarity under the same conditions. As mentioned above, the bombardment effect by the electrons is stronger than that by positive ions during electrical discharge machining ZnO/Al<sub>2</sub>O<sub>3</sub> ceramic. Stronger electrons bombardment results in bigger and deeper craters, leading to a rougher surface, as illustrated in Figure 15(a). Weaker positive ions bombardment results that more molten material re-solidified on the surface in case of positive tool polarity, leading to a smoother

surface, as illustrated in Figure 15(b). This observation is in accordance with the roughness values, presented in Figure 7.

**Micro-cracks on the machined surface.** Figure 16 shows the micro-cracks on the machined ZnO/Al<sub>2</sub>O<sub>3</sub> ceramic surfaces with different electrical resistivities. The microcracks formation is associated with the development of high thermal stresses during machining, and it is responsible for the thermal spalling removal of the ZnO/Al<sub>2</sub>O<sub>3</sub> ceramic. It can also be seen from Figure 16 that the number and size of the micro-cracks on the machined surface increase with the decrease of electrical resistivity. The phenomenon can be explained as follows. As the electrical resistivity decreases, the discharge channel is formed relatively easily, the discharge becomes violent, the thermal impact and thermal stress increase, so the number and size of the micro-cracks on the machined surface increase with the decrease of electrical resistivity.

**Compositions of the machined surface.** Energy dispersive spectrometer (EDS) spectrum analysis is used to identify the elemental composition on the workpiece surface generated in different machining conditions. Figure 17 shows the EDS spectrum analysis of the ZnO/Al<sub>2</sub>O<sub>3</sub> ceramic surface with the electrical resistivity of 6.3 Ω·cm and different electrode materials, in which Figure 17(a) shows the EDS spectrum analysis of the unprocessed ZnO/Al<sub>2</sub>O<sub>3</sub> ceramic surface, Figure 17(b) shows the EDS spectrum analysis of the machined ZnO/Al<sub>2</sub>O<sub>3</sub> ceramic surface with the copper electrode, and Figure 17(c) shows the EDS spectrum analysis of the machined ZnO/Al<sub>2</sub>O<sub>3</sub> ceramic surface with the graphite electrode. It can be seen from Figure 17 that the prominent elements on the machined surface are carbon (C), oxygen (O), aluminum (Al), and zinc (Zn), whereas the prominent

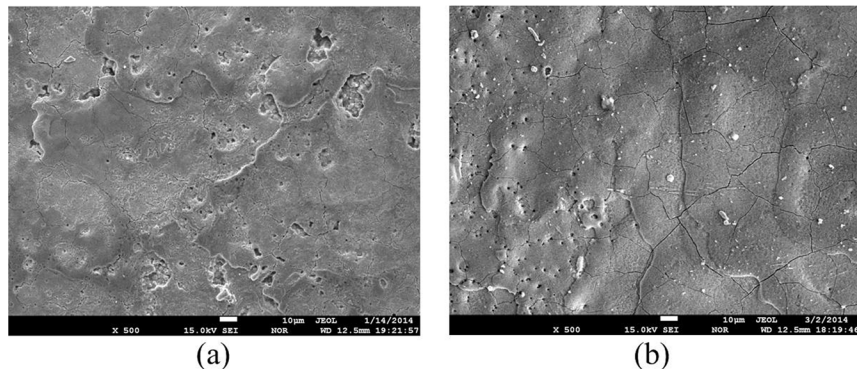

(a)

(b)

**Figure 16. Microcracks on machined ZnO/Al<sub>2</sub>O<sub>3</sub> surfaces with different electrical resistivities: (a) 15 Ω·cm; (b) 6.3 Ω·cm.**  
doi:10.1371/journal.pone.0110775.g016

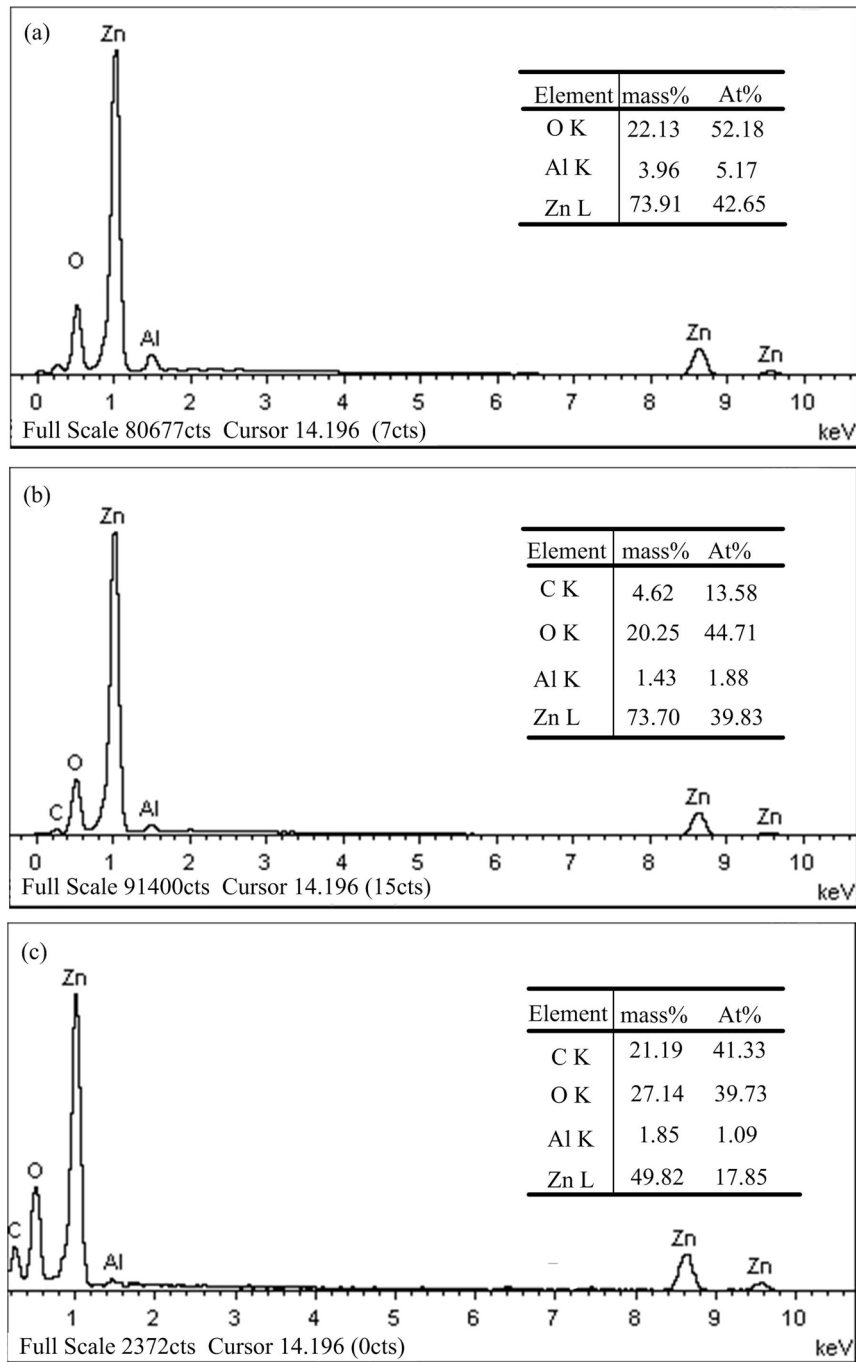

**Figure 17. EDS analysis of ZnO/Al<sub>2</sub>O<sub>3</sub> surfaces with different electrode materials: (a) unprocessed; (b) copper; (c) graphite.**  
doi:10.1371/journal.pone.0110775.g017

elements on the unprocessed surface are oxygen (O), aluminum (Al), and zinc (Zn). Moreover, the carbon percentage on the machined ZnO/Al<sub>2</sub>O<sub>3</sub> ceramic surface is higher with the graphite electrode than that with the copper electrode. This is a complex phenomenon. During electrical discharge machining ZnO/Al<sub>2</sub>O<sub>3</sub> ceramic, the working fluid can be decomposed, generating carbon element, which will deposit on the workpiece surface, so carbon element is detected on the machined surface. Moreover, compared with the copper electrode, more carbon will be produced with the graphite electrode due to its low hardness and soft texture, so the carbon percentage on the machined ZnO/Al<sub>2</sub>O<sub>3</sub> ceramic surface

is higher with the graphite electrode than that with the copper electrode.

## Conclusions

This study attempts to investigate the effects of the electrical resistivity and the EDM parameters on EDM performance of ZnO/Al<sub>2</sub>O<sub>3</sub> ceramics. The following conclusions could be drawn from this study:

(1) The electrical resistivity of the ZnO/Al<sub>2</sub>O<sub>3</sub> ceramic, which can be effectively machined by EDM, is high with the copper



electrode, the negative tool polarity, and the shorter pulse interval. Moreover, the ZnO/Al<sub>2</sub>O<sub>3</sub> ceramic with the electrical resistivity up to 3410 Ω·cm can be effectively machined by EDM with the appropriate machining condition.

(2) The EDM performance of ZnO/Al<sub>2</sub>O<sub>3</sub> ceramic with the electrical resistivity higher than 687 Ω·cm, is obviously different from that with the electrical resistivity lower than 687 Ω·cm, when the electrode material changes.

(3) Under the same machining condition, the MRR increases with the decrease of electrical resistivity. At the same electrical resistivity, the higher MRR can be obtained with the negative tool polarity, the copper electrode, and the shorter pulse interval.

(4) The tool polarity, and pulse interval affect the EWR, respectively, and the lower EWR can be obtained with the negative polarity, the shorter pulse interval at the same electrical resistivity. Moreover, the electrical resistivity and electrode material have a combined effect on the EWR.

(5) Under most machining conditions, the SR decreases with the decrease of electrical resistivity. At the same electrical resistivity, the lower SR can be obtained with positive tool polarity, the longer pulse interval, and copper electrode.

(6) The machined surfaces are characterized by craters, droplets, micropores and microcracks. The removal mechanism during electrical discharge machining ZnO/Al<sub>2</sub>O<sub>3</sub> ceramic consists of melting, evaporation and thermal spalling. The chemical compositions of the machined surface differ from the unprocessed surface due to the carbon element deposition from the working fluid and graphite electrode.

## Acknowledgments

The authors thank Associate Professor Jinquan Sun (College of Materials Science and Engineering, Shandong University of Science and Technology) for his helpful measurement of the electrical resistivity of the ZnO/Al<sub>2</sub>O<sub>3</sub> ceramics. We also thank Dr. Huaiping Wang (College of Chemical Engineering, China University of Petroleum) for his helpful microstructure measurement of ZnO/Al<sub>2</sub>O<sub>3</sub> ceramic surface.

## Author Contributions

Conceived and designed the experiments: RJ YL. Performed the experiments: RD. Analyzed the data: RJ CX. Contributed reagents/materials/analysis tools: XL BC. Wrote the paper: RJ YZ. Modified the manuscript: FW.

## References

- Okada A (2008) Automotive and industrial applications of structural ceramics in Japan. *J Eur Ceram Soc* 28(5): 1097–1104.
- Liang XH, Lin B, Han XS, Chen SG (2012) Fractal analysis of engineering ceramics ground surface. *Appl Surf Sci* 258(17): 6406–6415.
- Feng J, Chen P, Ni J (2013) Prediction of grinding force in microgrinding of ceramic materials by cohesive zone-based finite element method. *Int J Adv Manuf Technol* 68(5–8): 1039–1053.
- Lalchhuanvela H, Doloi B, Bhattacharyya B (2013) Analysis on profile accuracy for ultrasonic machining of alumina ceramics. *Int J Adv Manuf Technol* 67(5–8): 1683–1691.
- Chen S, Lin B, Han X, Liang X (2013) Automated inspection of engineering ceramic grinding surface damage based on image recognition. *Int J Adv Manuf Technol* 66(1–4): 431–443.
- Wei C, Zhao L, Hu D, Ni J (2013) Electrical discharge machining of ceramic matrix composites with ceramic fiber reinforcements. *Int J Adv Manuf Technol* 64(1–4): 187–194.
- Puertas I, Luis CJ (2012) Optimization of EDM conditions in the manufacturing process of B<sub>4</sub>C and WC-Co conductive ceramics. *Int J Adv Manuf Technol* 59(5–8): 575–582.
- Patel KM, Pandey PM, Venkateswara Rao P (2010) Optimisation of process parameters for multi-performance characteristics in EDM of Al<sub>2</sub>O<sub>3</sub> ceramic composite. *Int J Adv Manuf Technol* 47(9–12): 1137–1147.
- Qiu M, Liu Z, Tian Z, Wang W, Huang Y (2013) Study of unidirectional conductivity on the electrical discharge machining of semiconductor crystals. *Precis Eng* 37(4): 902–907.
- König W, Dauw DF, Levy G, Panten U (1988) EDM-future steps towards the machining of ceramics. *CIRP Ann Manuf Technol* 37(2): 623–631.
- Liu YH, Ji RJ, Li QY, Yu LL, Li XP (2009) An experimental investigation for electric discharge milling of SiC ceramics with high electrical resistivity. *J Alloys Compd* 472(1–2): 406–410.
- Liu YH, Ji RJ, Li QY, Yu LL, Li XP (2008) Electric discharge milling of silicon carbide ceramic with high electrical resistivity. *Int J Mach Tools Manuf* 48(12–13): 1504–1508.
- Liu CC (2003) Microstructure and tool electrode erosion in EDM of TiN/Si<sub>3</sub>N<sub>4</sub> composites. *Mater Sci Eng A* 363(1–2): 221–227.
- Tak HS, Ha CS, Lee HJ, Lee HW, Jeong YK, et al. (2011) Characteristic evaluation of Al<sub>2</sub>O<sub>3</sub>/CNTs hybrid materials for micro-electrical discharge machining. *Trans Nonferrous Met Soc China (SUPPL. 1)*: s28–s32.
- Hanaoka D, Fukuzawa Y, Ramirez C, Miranzo P, Osendi MI, et al. (2013) Electrical discharge machining of ceramic/carbon nanostructure composites. *Procedia CIRP* 6: 95–100.
- Ji RJ, Liu YH, Zhang YZ, Cai BP, Li XP (2011) High-speed end electric discharge milling of silicon carbide ceramics. *Mater Manuf Process* 26(8): 1050–1058.
